# Supplementary figures and images for: Single-step in vitro ribosome reconstitution mediated by two GTPase factors, EngA and ObgE
Source: eLife journal article supplement (doi:10.7554/elife.109916), 2026-02-06

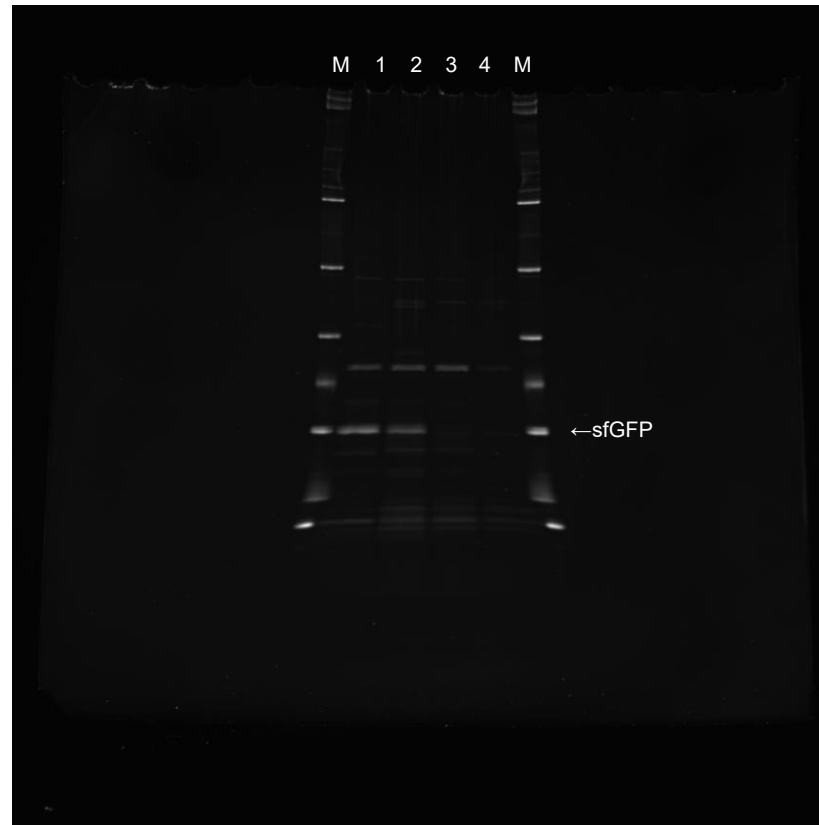

Supplement: fig7-data2 [file Figure7-SourceData2.pdf › Figure7-SourceData2.pdf]
